# Supplementary material for: Autoantibodies to synapsin I sequestrate synapsin I and alter synaptic function
Source: Springer Nature journal article supplement (doi:10.1038/s41419-019-2106-z), 2019-11-14
Supplement: MOESM1 [file 41419_2019_2106_MOESM1_ESM.pdf]

## Supplementary Table 1

### Demographic and clinical data of patients investigated in this study

| Patient ID               | Age at lumbar puncture, years | Sex    | clinical diagnosis            | SynIa IgG titer serum <sup>a</sup> | SynIa IgG titer CSF <sup>a</sup> | SynIa IgA titer serum | SynIa IgA titer CSF |
|--------------------------|-------------------------------|--------|-------------------------------|------------------------------------|----------------------------------|-----------------------|---------------------|
| LE-Patient <sup>b</sup>  | 69                            | male   | Limbic encephalitis           | 1:3,200                            | 1:3,200                          | 1:1,000               | 1:1,000             |
| CIS-Patient <sup>c</sup> | 24                            | female | Clinically isolated syndrome  | 1:10,000                           | 1:1,000                          | not detectable        | not detectable      |
| Control patient #1       | 63                            | male   | Normal pressure hydrocephalus | not detectable                     | not detectable                   | not detectable        | not detectable      |
| Control patient #2       | 19                            | female | unspecific headache           | not detectable                     | not detectable                   | not detectable        | not detectable      |

<sup>a</sup>Antibodies to SynIa were determined in patients' serum and CSF by cell-based assays using HEK293 cells transfected with rat SynIa cDNA (Ref. Höltje et al. 2017 and Mertens et al. 2018).

<sup>b</sup>LE-Patient is the index patient in whom SynI Ab were originally identified. The clinical and paraclinical findings of this patient were previously reported in Piepgras et al. 2015.

<sup>c</sup>CSI-Patient is the same patient as patient CIS\_0117, previously reported in Höltje et al. 2017 and Mertens et al. 2018.
